# Supplementary material for: A platinum glutamate acid complex as a peroxidase mimic: high activity, controllable chemical modification, and application in biosensors
Source: Royal Society of Chemistry journal article supplement (doi:10.1039/d3ay02121a), 2024-01-01
Supplement: d3ay02121a1.pdf [file d3ay02121a1.pdf]

**Platinum Glutamate Acid Complex as a Peroxidase Mimic: High Activity, Controllable Chemical Modification, and Application in Biosensor**

Yuanyuan Zhang, Lexian Wu, Jing Yang, Guoming Li, Keqin Deng,  
Haowen Huang\*

### **Determination of the Michaelis-Menten constant**

Ethanol was employed as a solvent to prepare a 5mM solution of TMB, while water served as the solvent for the precise formulation of a 1mM solution of Glu-Pt. A comprehensive range of H<sub>2</sub>O<sub>2</sub> concentrations (5, 4.5, 4, 3.5, 3, 2.5, 2, 1.5, 1, 0.5, 0.2mM) was prepared. Each well of a microplate received 80μL of Glu-Pt and 80μL of TMB, separately. Subsequently, 40μL of H<sub>2</sub>O<sub>2</sub> at varying concentrations was meticulously added to each well. The final concentrations in the microplate were 2mM for TMB, 0.4mM for Glu-Pt, and diverse concentrations of H<sub>2</sub>O<sub>2</sub> (1, 0.9, 0.8, 0.7, 0.6, 0.5, 0.4, 0.3, 0.2, 0.1, 0.04mM). Each concentration set underwent a meticulous triplicate parallel experimentation. The microplate underwent uniform shaking, initiating an 8-minute reaction period. Following this, the absorbance at 652 nm was precisely measured using a microplate reader. C/V curves and double reciprocal curves were adeptly generated to gain comprehensive insights into the reaction dynamics. The determination of the Michaelis-Menten constant ( $K_m$ ) was carried out to provide a quantitative measure of the enzymatic activity.

### Glutamic acid

$^1\text{H}$  NMR (400 MHz  $\text{D}_2\text{O}$ ):  $\delta$  3.74 (t,  $J = 6.4$  Hz, 1H), 2.55–2.42 (m, 2H), 2.15–2.01 (m, 2H).

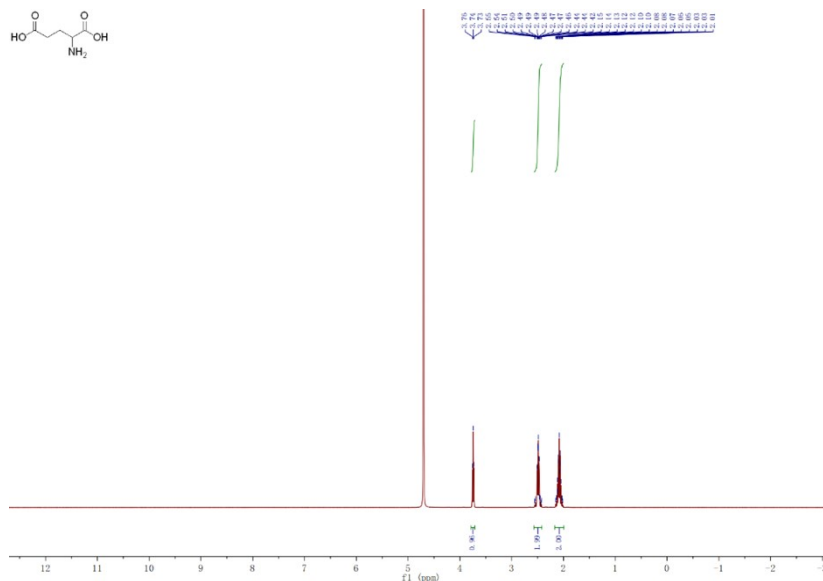

### Platinum glutamic acid complex:

$^1\text{H}$  NMR (400 MHz  $\text{D}_2\text{O}$ ):  $\delta$  4.07 (t,  $J = 6.7$  Hz, 2H), 2.61–2.57 (m, 4H), 2.24–2.12 (m, 4H).

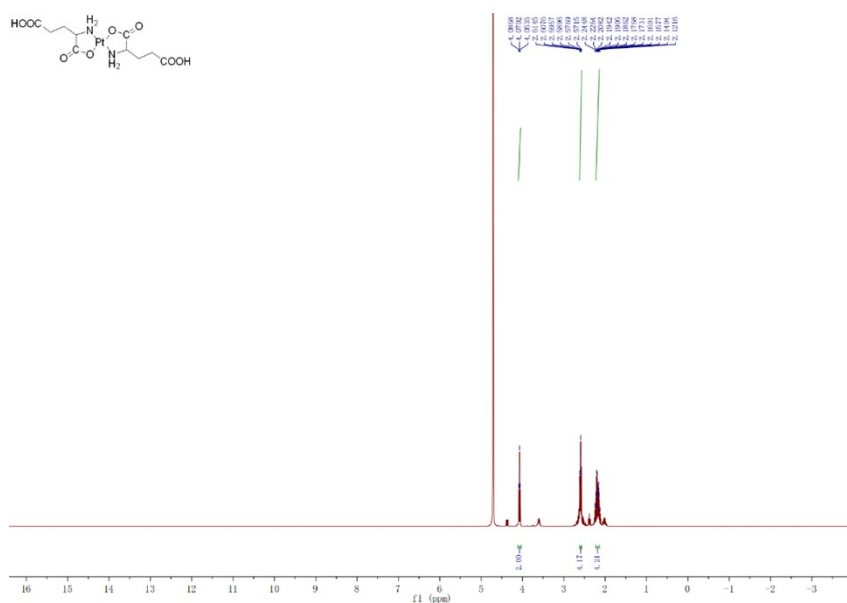

**Fig. S1.**  $^1\text{H}$  400 MHz NMR spectra of glutamic acid (top) and platinum glutamic acid complex (bottom).

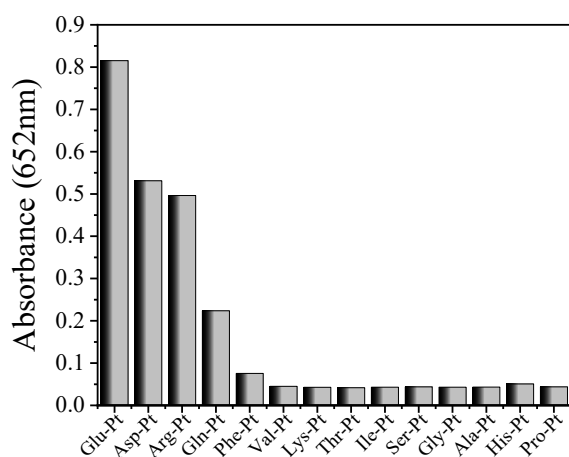

**Fig. S2.** The comparison of peroxidase-like activity of platinum complexes formed with amino acids.

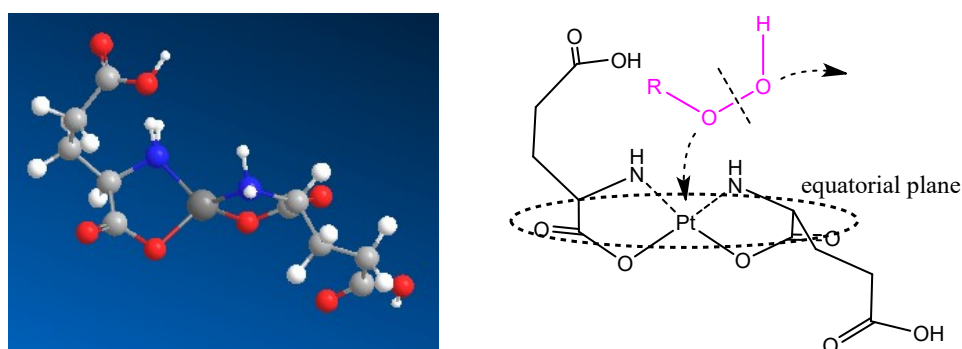

**Fig. S3.** The structure of  $\text{Pt}(\text{Glu})_2$  (right) and a schematic representation of its coordination with  $\text{H}_2\text{O}_2$  (left).

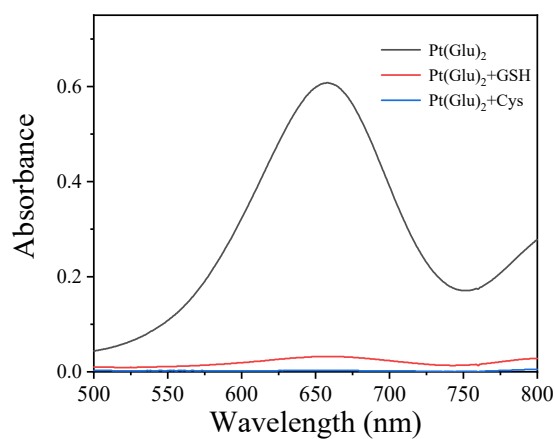

**Fig. S4.** The absorption spectra obtained from the  $\text{H}_2\text{O}_2$  and TMB in the presence of  $\text{Pt}(\text{Glu})_2$ ,  $\text{Pt}(\text{Glu})_2+\text{GSH}$ , and  $\text{Pt}(\text{Glu})_2+\text{cysteine}$ .

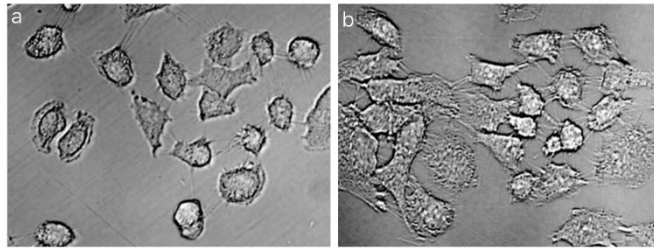

**Fig. S5.** Bioimaging HCCLM3 incubated with the mixture of GOx and Pt(Glu)<sub>2</sub> (a) and GOx chemically modified with Pt(Glu)<sub>2</sub>(b).

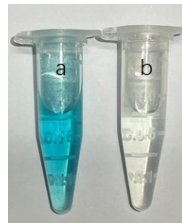

**Fig. S6.** Color change upon the addition of cholesterol in the ChOx-Pt(Glu)<sub>2</sub>/TMB (a) and ChOx/TMB (b).

**Table S1.** Comparison of nanozyme-based detection methods for cholesterol detection.

| Sensing system                                           | Analytical method                 | Linear range<br>( $\mu\text{M}$ ) | LOD<br>( $\mu\text{M}$ ) | Reference |
|----------------------------------------------------------|-----------------------------------|-----------------------------------|--------------------------|-----------|
| Nanoporous Gold                                          | Electrochemistry                  | 50-6000                           | 8.4                      | 1         |
| ChOx/CS-GR/GCE                                           | Differential Pulse<br>Voltammetry | 5-1000                            | 0.715                    | 2         |
| carbon dot/hemoglobin                                    | Fluorometry                       | 0-800                             | 56                       | 3         |
| N-GQDs/Chromium<br>Picolinate                            | Fluorometry                       | 0-520                             | 0.4                      | 4         |
| Boron nitride<br>nanosheet@CuS                           | Colorimetry                       | 10-100                            | 2.9                      | 5         |
| Fe <sub>3</sub> O <sub>4</sub> magnetic<br>nanoparticles | Colorimetry                       | 2-50                              | 0.8                      | 6         |
| Polypyrrole NPs                                          | Colorimetry                       | 10-100                            | 3.5                      | 7         |
| Pt(Glu) <sub>2</sub>                                     | Colorimetry                       | 0.1-80                            | 0.56                     | This work |

**Table S2.** Comparison of other detection methods for ALP detection

| Sensing system                                               | Analytical method | Linear<br>range(U/L) | LOD (U/L) | Reference |
|--------------------------------------------------------------|-------------------|----------------------|-----------|-----------|
| CdSe nanoparticles                                           | Electrochemistry  | 2-25                 | 2         | 8         |
| Lumin-SiNPs                                                  | Electrochemistry  | 5-50                 | 0.8       | 9         |
| Dopamine-resorcinol                                          | Fluorometry       | 0.1-6.0              | 0.07      | 10        |
| O-phenylenediamine -<br>Ascorbic acid 2-<br>phosphate        | Fluorometry       | 0.1-30               | 0.06      | 11        |
| N-CDs                                                        | Fluorometry       | 2.5-45               | 0.4       | 12        |
| Cu Alkyne-azide<br>cycloaddition and DNA-<br>templated CuNPs | Fluorometry       | 100-1600             | 50        | 13        |
| Ce <sup>4+</sup> -TMB                                        | Colorimetry       | 50-250               | 2.3       | 14        |
| Fe <sub>55</sub> -N-C                                        | Colorimetry       | 0.05-20              | 0.03      | 15        |
| Fe(II)-phenanthroline                                        | Colorimetry       | 0-220                | 0.94      | 16        |
| AuNPs-cystine                                                | Colorimetry       | 0.2-20               | 0.2       | 17        |

|                                               |             |         |      |           |
|-----------------------------------------------|-------------|---------|------|-----------|
| Cu-<br>MOF/Pyrophosphate                      | Colorimetry | 1-34    | 0.19 | 18        |
| <b>Polydiacetylenes</b><br>liposomes          | Colorimetry | 10-200  | 2.8  | 19        |
| Cu-C <sub>3</sub> N <sub>4</sub> -550         | Colorimetry | 0.4-20  | 0.32 | 20        |
| FeCo NPs                                      | Colorimetry | 0.6-10  | 0.49 | 21        |
| <b>Fe-N-C single-atom</b><br><b>nanozymes</b> | Colorimetry | 0.1-1.5 | 0.05 | 22        |
| Pt(Glu) <sub>2</sub>                          | Colorimetry | 0.5-12  | 0.09 | This work |

## References

- (1) Wang, S.J.; Chen, S.Y.; Shang, K.H.; Gao, X.Y.; Wang, X. *Int. J. Biol. Macromol.* **2021**, 189, 356-62.
- (2) Li, Z.J.; Xie, C.C.; Wang, J.H.; Meng, A.L.; Zhang, F.H. *Sens. Actuators B Chem.* **2015**, 208, 505-511.
- (3) Bui, T.T.; Park, S.Y. *Green Chem.* **2016**, 18, 4245-4253.
- (4) Sun, L.; Li, S.S.; Ding, W.; Yao, Y.W.; Yang, X.Y.; Yao, C. *J. Mater. Chem. B* **2017**, 5, 9006-9014.
- (5) Zhang, Y.; Wang, Y.N.; Sun, X.T.; Chen, L.; Xu, Z.R. *Sens. Actuator B Chem.* **2017**, 246, 118-126.
- (6) Wu, Y.Z.; Ma, Y.J.; Xu, G.H.; Wei, F.D.; Ma, Y.S.; Song, Q.; Wang, X.; Tang, T.; Song, Y.Y.; Shi, M.L.; Xu, X.M.; Hu, Q. *Sens. Actuators B Chem.* **2017**, 249, 195-202.
- (7) Hong, C.Y.; Zhang, X.X.; Wu, C.Y.; Chen, Q.; Yang, H.F.; Yang, D.; Huang, Z.Y.; Cai, R.; Tan, W.H. *ACS Appl. Mater. Interfaces* **2020**, 12, 54426-54432.
- (8) Jiang, H.; Wang, X. *Anal. Chem.* **2012**, 84, 6986-6993.
- (9) Qi, W. J.; Fu, Y. L.; Zhao, M. Y.; He, H. K.; Tian, X.; Hu, L. Z.; Zhang, Y. *Anal. Chim. Acta* **2020**, 1097, 71-77.
- (10) Ni, P.J.; Chen, C.X.; Jiang, Y.Y.; Zhang, C.H.; Wang, B.; Lu, Y.Z.; Wang, H. *Sens. Actuators B Chem.* **2020**, 302, 127145.
- (11) Zhao, D.; Li, J.; Peng, C.Y.; Zhu, S.Y.; Sun, J.; Yang, X.R. *Anal. Chem.* **2019**, 91, 4, 2978-2984.
- (12) Hu, Y. L.; Geng, X.; Zhang, L.; Huang, Z. M.; Ge, J.; Li, Z. H. *Sci. Rep.* **2017**, 7, 5849.
- (13) Yang, D. W.; Guo, Z. Z.; Tang, Y. G.; Miao, P. *ACS Appl. Nano Mater.* **2018**, 1(1), 168-174.
- (14) Song, H.W.; Wang, H.Y.; Li, X.; Peng, Y.X.; Pan, J.M.; Niu, X.H. *Anal. Chim. Acta* **2018**, 1044, 154-161.

- (15) Liu, W.D.; Chu, L.; Zhang, C.H.; Ni, P.J.; Jiang, Y.Y.; Wang, B.; Lu, Y.Z.; Chen, C.X. *Chem. Eng. J.* **2021**, 415, 128876.
- (16) Hu, Q.; Zhou, B.; Dang, P.; Li, L.; Kong, J.; Zhang, X. *Anal. Chim. Acta* **2017**, 950, 170-177.
- (17) Xianyu, Y. L.; Wang, Z.; Jiang, X. Y. *ACS Nano* **2014**, 8, 12741-12747.
- (18) Wang, C.H.; Gao, J.; Cao, Y.L.; Tan, H.L. *Anal. Chim. Acta* **2018**, 1004, 74-81.
- (19) Wang, D. E.; You, S. Q.; Huo, W. J.; Han, X.; Xu, H. Y. *Microchim. Acta* (**2022**) 189:70.
- (20) Song, Y.F.; Huang, C.Z.; Li, Y.F. *ACS Appl. Nano Mater.* **2023**, 6, 1369-1378.
- (21) Wu, T.T.; Ma, Z.Y.; Li, P.P.; Liu, M.L.; Liu, X.Y.; Li, H.T.; Zhang, Y.Y.; Yao, S.Z. *Talanta* **2019**, 202, 354-361.
- (22) Xie, X. L.; Wan, Y.F.; Zhou, X.B.; Che, J.Y.; Wang, M. K.; Su, X. G. *Analyst* **2021**, 146, 896-903.
